# Supplementary material
Source: PubMed Central journal article supplement (PMC7255733)
Supplement: mmc1.pdf [file mmc1.pdf]

# THE LANCET Infectious Diseases

## Supplementary webappendix

This webappendix formed part of the original submission. We post it as supplied by the authors.

Supplement to: Osório NS, Correia-Neves M. Implication of SARS-CoV-2 evolution in the sensitivity of RT-qPCR diagnostic assays. *Lancet Infect Dis* 2020; published online May 28. [https://doi.org/10.1016/S1473-3099\(20\)30435-7](https://doi.org/10.1016/S1473-3099(20)30435-7).

We acknowledge all the authors originating and submitting the sequences used in this study. Detailed information can be obtained in NCBI or GISAID databases using the sequence identifiers bellow:

NC\_045512; hCoV-19/Algeria/G0638\_2264/2020; hCoV-19/Algeria/G0640\_2265/2020; hCoV-19/Australia/NSW01/2020; hCoV-19/Australia/NSW02/2020; hCoV-19/Australia/NSW03/2020; hCoV-19/Australia/NSW04/2020; hCoV-19/Australia/NSW05/2020; hCoV-19/Australia/NSW06/2020; hCoV-19/Australia/NSW07/2020; hCoV-19/Australia/NSW08/2020; hCoV-19/Australia/NSW09/2020; hCoV-19/Australia/NSW10/2020; hCoV-19/Australia/NSW11/2020; hCoV-19/Australia/NSW12/2020; hCoV-19/Australia/NSW13/2020; hCoV-19/Australia/NSW14/2020; hCoV-19/Australia/NSW15/2020; hCoV-19/Australia/NSW18/2020; hCoV-19/Australia/NSW19/2020; hCoV-19/Australia/NSW21/2020; hCoV-19/Australia/NSW24/2020; hCoV-19/Australia/NSW25/2020; hCoV-19/Australia/NSW26/2020; hCoV-19/Australia/NSW27/2020; hCoV-19/Australia/NSW28/2020; hCoV-19/Australia/NSW35/2020; hCoV-19/Australia/NSW36/2020; hCoV-19/Australia/NSW37/2020; hCoV-19/Australia/NSW38/2020; hCoV-19/Australia/NSW39/2020; hCoV-19/Australia/NSW40/2020; hCoV-19/Australia/NSW41/2020; hCoV-19/Australia/NSW44/2020; hCoV-19/Australia/NSW45/2020; hCoV-19/Australia/NSW47/2020; hCoV-19/Australia/NSW48/2020; hCoV-19/Australia/NSW50/2020; hCoV-19/Australia/NSW52/2020; hCoV-19/Australia/NSW53/2020; hCoV-19/Australia/NSW54/2020; hCoV-19/Australia/NSW56/2020; hCoV-19/Australia/NSW57/2020; hCoV-19/Australia/NSW58/2020; hCoV-19/Australia/NSW61/2020; hCoV-19/Australia/NSW62/2020; hCoV-19/Australia/QLD01/2020; hCoV-19/Australia/QLD02/2020; hCoV-19/Australia/QLD03/2020; hCoV-19/Australia/QLD04/2020; hCoV-19/Australia/QLD09/2020; hCoV-19/Australia/QLDID919/2020; hCoV-19/Australia/QLDID920/2020; hCoV-19/Australia/QLDID921/2020; hCoV-19/Australia/VIC02/2020; hCoV-19/Australia/VIC03/2020; hCoV-19/Australia/VIC04/2020; hCoV-19/Australia/VIC05/2020; hCoV-19/Australia/VIC07/2020; hCoV-19/Australia/VIC08/2020; hCoV-19/Australia/VIC09/2020; hCoV-19/Australia/VIC10/2020; hCoV-19/Beijing/105/2020; hCoV-19/Beijing/231/2020; hCoV-19/Beijing/233/2020; hCoV-19/Beijing/235/2020; hCoV-19/Beijing/IVDC-BJ-005/2020; hCoV-19/Belgium/BA-02291/2020; hCoV-19/Belgium/BC-03016/2020; hCoV-19/Belgium/BM-03012/2020; hCoV-19/Belgium/DB-03023/2020; hCoV-19/Belgium/DBA-03032/2020; hCoV-19/Belgium/DBD-03024/2020; hCoV-19/Belgium/DHWM-03041/2020; hCoV-19/Belgium/FR-03029/2020; hCoV-19/Belgium/GHB-03021/2020; hCoV-19/Belgium/GMH-03022/2020; hCoV-19/Belgium/KA-03042/2020; hCoV-19/Belgium/MMJ-03034/2020; hCoV-19/Belgium/MTR-03021/2020; hCoV-19/Belgium/MTR-03026/2020; hCoV-19/Belgium/QKJ-03015/2020; hCoV-19/Belgium/RT-03035/2020; hCoV-19/Belgium/SH-03014/2020; hCoV-19/Belgium/SN-03031/2020; hCoV-19/Belgium/SQ-03043/2020; hCoV-19/Belgium/ULG-2971/2020; hCoV-19/Belgium/ULG-3000/2020; hCoV-19/Belgium/ULG-3163/2020; hCoV-19/Belgium/ULG-3662/2020; hCoV-19/Belgium/ULG-3665/2020; hCoV-19/Belgium/ULG-3843/2020; hCoV-19/Belgium/ULG-4163/2020; hCoV-19/Belgium/ULG-6216/2020; hCoV-19/Belgium/ULG-6457/2020; hCoV-19/Belgium/ULG-6503/2020; hCoV-19/Belgium/ULG-6638/2020; hCoV-19/Belgium/ULG-6670/2020; hCoV-19/Belgium/ULG-6754/2020; hCoV-19/Belgium/ULG-6939/2020; hCoV-19/Belgium/ULG-6942/2020; hCoV-19/Belgium/ULG-6948/2020; hCoV-19/Belgium/ULG-6950/2020; hCoV-19/Belgium/ULG-6972/2020; hCoV-19/Belgium/ULG-7019/2020; hCoV-19/Belgium/UMF-03025/2020; hCoV-19/Belgium/VAG-03013/2020; hCoV-19/Belgium/VBK-03061/2020; hCoV-19/Belgium/VI-03027/2020; hCoV-19/Belgium/VLM-03011/2020; hCoV-19/Brazil/AMBR-02/2020; hCoV-19/Brazil/BA-312/2020; hCoV-19/Brazil/ES-225/2020; hCoV-19/Brazil/RJ-314/2020; hCoV-19/Brazil/SPBR-02/2020; hCoV-19/Brazil/SPBR-03/2020; hCoV-

19/Brazil/SPBR-04/2020; hCoV-19/Brazil/SPBR-05/2020; hCoV-19/Brazil/SPBR-06/2020; hCoV-19/Brazil/SPBR-07/2020; hCoV-19/Brazil/SPBR-08/2020; hCoV-19/Brazil/SPBR-09/2020; hCoV-19/Brazil/SPBR-10/2020; hCoV-19/Brazil/SPBR-11/2020; hCoV-19/Brazil/SPBR-12/2020; hCoV-19/Brazil/SPBR-13/2020; hCoV-19/Cambodia/0012/2020; hCoV-19/Canada/BC\_02421/2020; hCoV-19/Canada/BC\_40860/2020; hCoV-19/Canada/BC\_41851/2020; hCoV-19/Canada/BC\_83109/2020; hCoV-19/Canada/ON-PHL2445/2020; hCoV-19/Chile/Santiago\_op2d1/2020; hCoV-19/Chile/Santiago\_op3d1/2020; hCoV-19/Chile/Santiago\_op4d1/2020; hCoV-19/Chile/Santiago-1/2020; hCoV-19/Chile/Santiago-2/2020; hCoV-19/Chile/Talca-1/2020; hCoV-19/Chile/Talca-2/2020; hCoV-19/China/IQTC01/2020; hCoV-19/China/IQTC02/2020; hCoV-19/China/WF0001/2020; hCoV-19/China/WF0002/2020; hCoV-19/China/WF0003/2020; hCoV-19/China/WF0004/2020; hCoV-19/China/WF0012/2020; hCoV-19/China/WF0014/2020; hCoV-19/China/WF0015/2020; hCoV-19/China/WF0016/2020; hCoV-19/China/WF0018/2020; hCoV-19/China/WF0019/2020; hCoV-19/China/WF0020/2020; hCoV-19/China/WF0026/2020; hCoV-19/China/WF0028/2020; hCoV-19/China/WF0029/2020; hCoV-19/China/WH-09/2020; hCoV-19/China/WHU01/2020; hCoV-19/China/WHU02/2020; hCoV-19/Chongqing/IVDC-CQ-001/2020; hCoV-19/Chongqing/YC01/2020; hCoV-19/Chongqing/ZX01/2020; hCoV-19/Congo/108/2020; hCoV-19/Congo/158/2020; hCoV-19/Congo/191/2020; hCoV-19/Congo/73/2020; hCoV-19/Congo/80/2020; hCoV-19/Congo/81/2020; hCoV-19/Congo/82/2020; hCoV-19/Congo/94/2020; hCoV-19/Congo/KN-0054/2020; hCoV-19/Congo/KN-0058/2020; hCoV-19/Congo/KN-0060/2020; hCoV-19/Congo/KN-0072/2020; hCoV-19/Czech Republic/ChVir1630/2020; hCoV-19/Czech Republic/ChVir1912/2020; hCoV-19/Czech Republic/951/2020; hCoV-19/Denmark/SSI-01/2020; hCoV-19/Denmark/SSI-02/2020; hCoV-19/Denmark/SSI-03/2020; hCoV-19/Denmark/SSI-04/2020; hCoV-19/Denmark/SSI-05/2020; hCoV-19/Denmark/SSI-09/2020; hCoV-19/Denmark/SSI-101/2020; hCoV-19/Denmark/SSI-102/2020; hCoV-19/Denmark/SSI-104/2020; hCoV-19/England/01/2020; hCoV-19/England/02/2020; hCoV-19/England/09c/2020; hCoV-19/England/200940527/2020; hCoV-19/England/200960041/2020; hCoV-19/England/200960515/2020; hCoV-19/England/200981386/2020; hCoV-19/England/200990002/2020; hCoV-19/England/200990006/2020; hCoV-19/England/20099038206/2020; hCoV-19/England/200990660/2020; hCoV-19/England/200990723/2020; hCoV-19/England/200990724/2020; hCoV-19/England/200990725/2020; hCoV-19/England/200991076/2020; hCoV-19/England/201000003/2020; hCoV-19/England/20100004806/2020; hCoV-19/England/20100022706/2020; hCoV-19/England/20100121007/2020; hCoV-19/England/20100122106/2020; hCoV-19/England/20102000506/2020; hCoV-19/England/20102068502/2020; hCoV-19/England/20102098802/2020; hCoV-19/England/20104003002/2020; hCoV-19/England/20104004902/2020; hCoV-19/England/20104007503/2020; hCoV-19/England/201040081/2020; hCoV-19/England/20104008402/2020; hCoV-19/England/20104008702/2020; hCoV-19/England/20104008802/2020; hCoV-19/England/20104008902/2020; hCoV-19/England/20104009002/2020; hCoV-19/England/20104009102/2020; hCoV-19/England/20104013703/2020; hCoV-19/England/201040141/2020; hCoV-19/England/20104015302/2020; hCoV-19/England/20104035803/2020; hCoV-19/England/20106004803/2020; hCoV-19/England/20106005403/2020; hCoV-19/England/20106145903/2020; hCoV-19/England/20108003302/2020; hCoV-19/England/20108004702/2020; hCoV-19/England/20108006003/2020; hCoV-19/England/20108006802/2020; hCoV-19/England/20108007002/2020; hCoV-19/England/20108007302/2020; hCoV-19/England/20108034006/2020; hCoV-19/England/20109035906/2020; hCoV-19/England/20109039306/2020; hCoV-19/England/20109050406/2020; hCoV-19/England/20109050506/2020; hCoV-

19/England/20109050606/2020; hCoV-19/England/20109050706/2020; hCoV-19/England/20109050806/2020; hCoV-19/England/20109051806/2020; hCoV-19/England/20109052006/2020; hCoV-19/England/20109053606/2020; hCoV-19/England/20109054806/2020; hCoV-19/England/20109056906/2020; hCoV-19/England/20109093806/2020; hCoV-19/England/20109094006/2020; hCoV-19/England/20109094106/2020; hCoV-19/England/20109094206/2020; hCoV-19/England/20109094506/2020; hCoV-19/England/20109097506/2020; hCoV-19/England/20109098806/2020; hCoV-19/England/20109099006/2020; hCoV-19/England/20109099106/2020; hCoV-19/England/20109099206/2020; hCoV-19/England/20110000606/2020; hCoV-19/England/20110000706/2020; hCoV-19/England/20110003506/2020; hCoV-19/England/20110023706/2020; hCoV-19/England/20110058706/2020; hCoV-19/England/20112112106/2020; hCoV-19/England/20118044606/2020; hCoV-19/England/SHEF-BFCB1/2020; hCoV-19/England/SHEF-BFCC0/2020; hCoV-19/England/SHEF-BFCDF/2020; hCoV-19/England/SHEF-BFCEE/2020; hCoV-19/England/SHEF-BFCFD/2020; hCoV-19/England/SHEF-BFD45/2020; hCoV-19/England/SHEF-BFD54/2020; hCoV-19/England/Sheff01/2020; hCoV-19/England/Sheff02/2020; hCoV-19/Finland/1/2020; hCoV-19/Finland/FIN03032020B/2020; hCoV-19/Finland/FIN03032020C/2020; hCoV-19/Finland/FIN-266/2020; hCoV-19/Finland/FIN-313/2020; hCoV-19/Finland/FIN-455/2020; hCoV-19/Finland/FIN-508/2020; hCoV-19/Foshan/20SF207/2020; hCoV-19/Foshan/20SF210/2020; hCoV-19/Foshan/20SF211/2020; hCoV-19/France/B1623/2020; hCoV-19/France/B2330/2020; hCoV-19/France/B2334/2020; hCoV-19/France/B2335/2020; hCoV-19/France/B2336/2020; hCoV-19/France/B2337/2020; hCoV-19/France/B2340/2020; hCoV-19/France/B2343/2020; hCoV-19/France/B2344/2020; hCoV-19/France/B2346/2020; hCoV-19/France/B2348/2020; hCoV-19/France/B2349/2020; hCoV-19/France/B2351/2020; hCoV-19/France/BFC2094/2020; hCoV-19/France/BFC2147/2020; hCoV-19/France/Bourg-en-Bresse\_06678/2020; hCoV-19/France/Bourg-en-Bresse\_06813/2020; hCoV-19/France/Clermont-Ferrand\_650/2020; hCoV-19/France/Clermont-Ferrand\_651/2020; hCoV-19/France/CVL2000/2020; hCoV-19/France/GE1583/2020; hCoV-19/France/GE1583/2020; hCoV-19/France/GE1973/2020; hCoV-19/France/GE1977/2020; hCoV-19/France/HF1465/2020; hCoV-19/France/HF1645/2020; hCoV-19/France/HF1684/2020; hCoV-19/France/HF1795/2020; hCoV-19/France/HF1805/2020; hCoV-19/France/HF1871/2020; hCoV-19/France/HF1988/2020; hCoV-19/France/HF1993/2020; hCoV-19/France/HF1995/2020; hCoV-19/France/HF2039/2020; hCoV-19/France/HF2060/2020; hCoV-19/France/HF2150/2020; hCoV-19/France/HF2155/2020; hCoV-19/France/HF2174/2020; hCoV-19/France/HF2196/2020; hCoV-19/France/HF2234/2020; hCoV-19/France/HF2237/2020; hCoV-19/France/HF2239/2020; hCoV-19/France/HF2381/2020; hCoV-19/France/HF2393/2020; hCoV-19/France/HF2405/2020; hCoV-19/France/HF2496/2020; hCoV-19/France/HF2586/2020; hCoV-19/France/HF2595/2020; hCoV-19/France/HF2597/2020; hCoV-19/France/HF2601/2020; hCoV-19/France/IDF0372/2020; hCoV-19/France/IDF0372-isl/2020; hCoV-19/France/IDF0373/2020; hCoV-19/France/IDF0386-islP1/2020; hCoV-19/France/IDF0386-islP3/2020; hCoV-19/France/IDF0515/2020; hCoV-19/France/IDF0515-isl/2020; hCoV-19/France/IDF0571/2020; hCoV-19/France/IDF0626/2020; hCoV-19/France/IDF2075/2020; hCoV-19/France/IDF2256/2020; hCoV-19/France/IDF2278/2020; hCoV-19/France/IDF2284/2020; hCoV-19/France/IDF2410/2020; hCoV-19/France/IDF2420/2020; hCoV-19/France/IDF2532/2020; hCoV-19/France/IDF2533/2020; hCoV-19/France/IDF2534/2020; hCoV-19/France/IDF2561/2020; hCoV-19/France/IDF2684/2020; hCoV-19/France/Lyon\_06042/2020; hCoV-19/France/Lyon\_06056/2020; hCoV-19/France/Lyon\_06464/2020; hCoV-19/France/Lyon\_06487/2020; hCoV-19/France/Lyon\_06531/2020; hCoV-19/France/Lyon\_06625/2020; hCoV-19/France/Lyon\_0668/2020; hCoV-19/France/Lyon\_06820/2020; hCoV-19/France/Lyon\_0693/2020; hCoV-19/France/Lyon\_487/2020;

hCoV-19/France/Lyon\_508/2020; hCoV-19/France/Lyon\_683/2020; hCoV-19/France/Macon\_06756/2020; hCoV-19/France/N1620/2020; hCoV-19/France/N2223/2020; hCoV-19/France/PL1643/2020; hCoV-19/France/Pollionay\_1733/2020; hCoV-19/France/Valence\_425/2020; hCoV-19/France/Valence\_532/2020; hCoV-19/Fujian/13/2020; hCoV-19/Fujian/8/2020; hCoV-19/Georgia/Tb/2020; hCoV-19/Georgia/Tb-273/2020; hCoV-19/Georgia/Tb-390/2020; hCoV-19/Georgia/Tb-468/2020; hCoV-19/Georgia/Tb-477/2020; hCoV-19/Georgia/Tb-537/2020; hCoV-19/Georgia/Tb-54/2020; hCoV-19/Georgia/Tb-673/2020; hCoV-19/Georgia/Tb-712/2020; hCoV-19/Georgia/Tb-82/2020; hCoV-19/Germany/Baden-Wuerttemberg-1/2020; hCoV-19/Germany/BavPat1/2020; hCoV-19/Germany/BavPat2/2020; hCoV-19/Germany/BavPat3/2020; hCoV-19/Germany/NRW-01/2020; hCoV-19/Germany/NRW-02-1/2020; hCoV-19/Germany/NRW-04/2020; hCoV-19/Germany/NRW-06/2020; hCoV-19/Germany/NRW-09/2020; hCoV-19/Germany/NRW-12/2020; hCoV-19/Germany/NRW-13/2020; hCoV-19/Germany/NRW-14/2020; hCoV-19/Germany/NRW-15/2020; hCoV-19/Germany/NRW-16/2020; hCoV-19/Germany/NRW-17/2020; hCoV-19/Germany/NRW-18/2020; hCoV-19/Germany/NRW-19/2020; hCoV-19/Germany/NRW-20/2020; hCoV-19/Germany/NRW-21/2020; hCoV-19/Germany/NRW-22/2020; hCoV-19/Germany/NRW-23/2020; hCoV-19/Greece/10/2020; hCoV-19/Greece/12/2020; hCoV-19/Greece/16/2020; hCoV-19/Guangdong/2020XN4243-P0035/2020; hCoV-19/Guangdong/2020XN4273-P0036/2020; hCoV-19/Guangdong/2020XN4373-P0039/2020; hCoV-19/Guangdong/2020XN4433-P0040/2020; hCoV-19/Guangdong/2020XN4448-P0002/2020; hCoV-19/Guangdong/2020XN4459-P0041/2020; hCoV-19/Guangdong/2020XN4475-P0042/2020; hCoV-19/Guangdong/20SF012/2020; hCoV-19/Guangdong/20SF013/2020; hCoV-19/Guangdong/20SF014/2020; hCoV-19/Guangdong/20SF025/2020; hCoV-19/Guangdong/20SF028/2020; hCoV-19/Guangdong/20SF040/2020; hCoV-19/Guangdong/20SF174/2020; hCoV-19/Guangdong/20SF201/2020; hCoV-19/Guangdong/GD2020080-P0010/2020; hCoV-19/Guangdong/GD2020086-P0021/2020; hCoV-19/Guangdong/GD2020087-P0008/2020; hCoV-19/Guangdong/GD2020233-P0027/2020; hCoV-19/Guangdong/GD2020234-P0023/2020; hCoV-19/Guangdong/GD2020246-P0028/2020; hCoV-19/Guangdong/GDSZ202015-P0019/2020; hCoV-19/Guangzhou/20SF206/2020; hCoV-19/Guangzhou/GZMU0014/2020; hCoV-19/Guangzhou/GZMU0016/2020; hCoV-19/Guangzhou/GZMU0030/2020; hCoV-19/Guangzhou/GZMU0031/2020; hCoV-19/Guangzhou/GZMU0044/2020; hCoV-19/Guangzhou/GZMU0047/2020; hCoV-19/Guangzhou/GZMU0048/2020; hCoV-19/Hangzhou/HZ-1/2020; hCoV-19/Hangzhou/HZCDC0001/2020; hCoV-19/Hangzhou/ZJU-01/2020; hCoV-19/Hangzhou/ZJU-02/2020; hCoV-19/Hangzhou/ZJU-03/2020; hCoV-19/Hangzhou/ZJU-04/2020; hCoV-19/Hangzhou/ZJU-05/2020; hCoV-19/Hangzhou/ZJU-06/2020; hCoV-19/Hangzhou/ZJU-07/2020; hCoV-19/Hangzhou/ZJU-08/2020; hCoV-19/Hangzhou/ZJU-09/2020; hCoV-19/Hefei/2/2020; hCoV-19/Hong Kong/VM20001061/2020; hCoV-19/Hong Kong/VB20024950/2020; hCoV-19/Hong Kong/VB20026565/2020; hCoV-19/Hong Kong/VM20002907/2020; hCoV-19/Hong Kong/VM20002868/2020; hCoV-19/Hong Kong/VM20002493/2020; hCoV-19/Hong Kong/VM20002507/2020; hCoV-19/Hong Kong/VM20002582/2020; hCoV-19/Hong Kong/VM20002849/2020; hCoV-19/Hong Kong/CUHK1/2020; hCoV-19/Hong Kong/VB20017970/2020; hCoV-19/Hong Kong/HKPU1\_2101/2020; hCoV-19/Hong Kong/HKPU6\_2101/2020; hCoV-19/Hong Kong/HKPU19\_0402/2020; hCoV-19/Hong Kong/HKPU28\_3001/2020; hCoV-19/Hong Kong/HKPU29\_0102/2020; hCoV-19/Hong Kong/HKPU29\_0102/2020; hCoV-19/Hong Kong/HKPU32\_0402/2020; hCoV-19/Hong Kong/HKPU34\_3001/2020; hCoV-19/Hungary/2/2020; hCoV-19/Hungary/49/2020; hCoV-19/Hungary/mbl1/2020; hCoV-19/Iceland/1/2020; hCoV-19/Iceland/10/2020; hCoV-19/Iceland/100/2020; hCoV-19/Iceland/101/2020; hCoV-19/Iceland/102/2020; hCoV-



19/Iceland/253/2020; hCoV-19/Iceland/254/2020; hCoV-19/Iceland/255/2020; hCoV-19/Iceland/256/2020; hCoV-19/Iceland/257/2020; hCoV-19/Iceland/258/2020; hCoV-19/Iceland/259/2020; hCoV-19/Iceland/260/2020; hCoV-19/Iceland/261/2020; hCoV-19/Iceland/262/2020; hCoV-19/Iceland/263/2020; hCoV-19/Iceland/264/2020; hCoV-19/Iceland/267/2020; hCoV-19/Iceland/269/2020; hCoV-19/Iceland/27/2020; hCoV-19/Iceland/270/2020; hCoV-19/Iceland/273/2020; hCoV-19/Iceland/274/2020; hCoV-19/Iceland/275/2020; hCoV-19/Iceland/279/2020; hCoV-19/Iceland/280/2020; hCoV-19/Iceland/281/2020; hCoV-19/Iceland/282/2020; hCoV-19/Iceland/283/2020; hCoV-19/Iceland/284/2020; hCoV-19/Iceland/285/2020; hCoV-19/Iceland/286/2020; hCoV-19/Iceland/287/2020; hCoV-19/Iceland/288/2020; hCoV-19/Iceland/29/2020; hCoV-19/Iceland/290/2020; hCoV-19/Iceland/291/2020; hCoV-19/Iceland/292/2020; hCoV-19/Iceland/293/2020; hCoV-19/Iceland/294/2020; hCoV-19/Iceland/296/2020; hCoV-19/Iceland/297/2020; hCoV-19/Iceland/3/2020; hCoV-19/Iceland/30/2020; hCoV-19/Iceland/300/2020; hCoV-19/Iceland/301/2020; hCoV-19/Iceland/303/2020; hCoV-19/Iceland/304/2020; hCoV-19/Iceland/305/2020; hCoV-19/Iceland/306/2020; hCoV-19/Iceland/307/2020; hCoV-19/Iceland/308/2020; hCoV-19/Iceland/31/2020; hCoV-19/Iceland/310/2020; hCoV-19/Iceland/312/2020; hCoV-19/Iceland/313/2020; hCoV-19/Iceland/314/2020; hCoV-19/Iceland/315/2020; hCoV-19/Iceland/316/2020; hCoV-19/Iceland/317/2020; hCoV-19/Iceland/318/2020; hCoV-19/Iceland/321/2020; hCoV-19/Iceland/322/2020; hCoV-19/Iceland/323/2020; hCoV-19/Iceland/324/2020; hCoV-19/Iceland/325/2020; hCoV-19/Iceland/326/2020; hCoV-19/Iceland/33/2020; hCoV-19/Iceland/330/2020; hCoV-19/Iceland/331/2020; hCoV-19/Iceland/333/2020; hCoV-19/Iceland/334/2020; hCoV-19/Iceland/335/2020; hCoV-19/Iceland/336/2020; hCoV-19/Iceland/338/2020; hCoV-19/Iceland/339/2020; hCoV-19/Iceland/341/2020; hCoV-19/Iceland/36/2020; hCoV-19/Iceland/37/2020; hCoV-19/Iceland/38/2020; hCoV-19/Iceland/39/2020; hCoV-19/Iceland/40/2020; hCoV-19/Iceland/45/2020; hCoV-19/Iceland/47/2020; hCoV-19/Iceland/5/2020; hCoV-19/Iceland/50/2020; hCoV-19/Iceland/52/2020; hCoV-19/Iceland/53/2020; hCoV-19/Iceland/54/2020; hCoV-19/Iceland/56/2020; hCoV-19/Iceland/57/2020; hCoV-19/Iceland/59/2020; hCoV-19/Iceland/6/2020; hCoV-19/Iceland/61/2020; hCoV-19/Iceland/62/2020; hCoV-19/Iceland/63/2020; hCoV-19/Iceland/64/2020; hCoV-19/Iceland/65/2020; hCoV-19/Iceland/66/2020; hCoV-19/Iceland/69/2020; hCoV-19/Iceland/7/2020; hCoV-19/Iceland/70/2020; hCoV-19/Iceland/72/2020; hCoV-19/Iceland/73/2020; hCoV-19/Iceland/74/2020; hCoV-19/Iceland/77/2020; hCoV-19/Iceland/78/2020; hCoV-19/Iceland/79/2020; hCoV-19/Iceland/8/2020; hCoV-19/Iceland/80/2020; hCoV-19/Iceland/81/2020; hCoV-19/Iceland/82/2020; hCoV-19/Iceland/83/2020; hCoV-19/Iceland/84/2020; hCoV-19/Iceland/89/2020; hCoV-19/Iceland/9/2020; hCoV-19/Iceland/90/2020; hCoV-19/Iceland/91/2020; hCoV-19/Iceland/93/2020; hCoV-19/Iceland/94/2020; hCoV-19/Iceland/95/2020; hCoV-19/Iceland/96/2020; hCoV-19/Iceland/97/2020; hCoV-19/Iceland/98/2020; hCoV-19/Iceland/LUH-01/2020; hCoV-19/India/1-31/2020; hCoV-19/Ireland/COR-20134/2020; hCoV-19/Ireland/Limerick-19934/2020; hCoV-19/Ireland/Limerick-19935/2020; hCoV-19/Italy/CDG1/2020; hCoV-19/Italy/FVG-ICGEB\_S1/2020; hCoV-19/Italy/FVG-ICGEB\_S5/2020; hCoV-19/Italy/FVG-ICGEB\_S8/2020; hCoV-19/Italy/FVG-ICGEB\_S9/2020; hCoV-19/Italy/INMI3/2020; hCoV-19/Italy/INMI3/2020; hCoV-19/Italy/INMI4/2020; hCoV-19/Italy/INMI4/2020; hCoV-19/Italy/INMI5/2020; hCoV-19/Italy/INMI5/2020; hCoV-19/Italy/SPL1/2020; hCoV-19/Italy/TE4836/2020; hCoV-19/Italy/TE4880/2020; hCoV-19/Italy/TE4925/2020; hCoV-19/Italy/TE4953/2020; hCoV-19/Italy/TE4959/2020; hCoV-19/Italy/TE5056/2020; hCoV-19/Italy/UniMI03/2020; hCoV-19/Italy/UniSR1/2020; hCoV-

19/Italy/UnivPM1/2020; hCoV-19/Japan/DP0005/2020; hCoV-19/Japan/DP0027/2020; hCoV-19/Japan/DP0037/2020; hCoV-19/Japan/DP0059/2020; hCoV-19/Japan/DP0065/2020; hCoV-19/Japan/DP0077/2020; hCoV-19/Japan/DP0078/2020; hCoV-19/Japan/DP0104/2020; hCoV-19/Japan/DP0107/2020; hCoV-19/Japan/DP0121/2020; hCoV-19/Japan/DP0133/2020; hCoV-19/Japan/DP0134/2020; hCoV-19/Japan/DP0152/2020; hCoV-19/Japan/DP0158/2020; hCoV-19/Japan/DP0184/2020; hCoV-19/Japan/DP0190/2020; hCoV-19/Japan/DP0191/2020; hCoV-19/Japan/DP0196/2020; hCoV-19/Japan/DP0200/2020; hCoV-19/Japan/DP0236/2020; hCoV-19/Japan/DP0274/2020; hCoV-19/Japan/DP0278/2020; hCoV-19/Japan/DP0287/2020; hCoV-19/Japan/DP0289/2020; hCoV-19/Japan/DP0290/2020; hCoV-19/Japan/DP0294/2020; hCoV-19/Japan/DP0311/2020; hCoV-19/Japan/DP0319/2020; hCoV-19/Japan/DP0328/2020; hCoV-19/Japan/DP0344/2020; hCoV-19/Japan/DP0346/2020; hCoV-19/Japan/DP0357/2020; hCoV-19/Japan/DP0361/2020; hCoV-19/Japan/DP0438/2020; hCoV-19/Japan/DP0457/2020; hCoV-19/Japan/DP0462/2020; hCoV-19/Japan/DP0464/2020; hCoV-19/Japan/DP0476/2020; hCoV-19/Japan/DP0481/2020; hCoV-19/Japan/DP0482/2020; hCoV-19/Japan/DP0543/2020; hCoV-19/Japan/DP0544/2020; hCoV-19/Japan/DP0568/2020; hCoV-19/Japan/DP0588/2020; hCoV-19/Japan/DP0644/2020; hCoV-19/Japan/DP0645/2020; hCoV-19/Japan/DP0654/2020; hCoV-19/Japan/DP0687/2020; hCoV-19/Japan/DP0690/2020; hCoV-19/Japan/DP0699/2020; hCoV-19/Japan/DP0700/2020; hCoV-19/Japan/DP0703/2020; hCoV-19/Japan/DP0724/2020; hCoV-19/Japan/DP0743/2020; hCoV-19/Japan/DP0752/2020; hCoV-19/Japan/DP0764/2020; hCoV-19/Japan/DP0765/2020; hCoV-19/Japan/DP0779/2020; hCoV-19/Japan/DP0785/2020; hCoV-19/Japan/DP0786/2020; hCoV-19/Japan/DP0802/2020; hCoV-19/Japan/DP0803/2020; hCoV-19/Japan/DP0804/2020; hCoV-19/Japan/DP0827/2020; hCoV-19/Japan/DP0880/2020; hCoV-19/Japan/DP0890/2020; hCoV-19/Japan/Hu\_DP\_Kng\_19-020/2020; hCoV-19/Japan/Hu\_DP\_Kng\_19-027/2020; hCoV-19/Japan/KY-V-029/2020; hCoV-19/Japan/NA-20-05-1/2020; hCoV-19/Japan/OS-20-07-1/2020; hCoV-19/Japan/SMU-0311S2/2020; hCoV-19/Japan/SMU-0311S3/2020; hCoV-19/Japan/TK-20-31-3/2020; hCoV-19/Japan/TKYE6182/2020; hCoV-19/Japan/TY-WK-012/2020; hCoV-19/Japan/TY-WK-501/2020; hCoV-19/Japan/TY-WK-521/2020; hCoV-19/Jiangsu/JS01/2020; hCoV-19/Jiangsu/JS02/2020; hCoV-19/Jiangsu/JS03/2020; hCoV-19/Jiangxi/IVDC-JX-002/2020; hCoV-19/Jingzhou/HBCDC-HB-01/2020; hCoV-19/Kuwait/KU09/2020; hCoV-19/Kuwait/KU12/2020; hCoV-19/Kuwait/KU17/2020; hCoV-19/Kuwait/KU18/2020; hCoV-19/Lithuania/ChVir1632/2020; hCoV-19/Luxembourg/LNS0158952/2020; hCoV-19/Luxembourg/LNS2013896/2020; hCoV-19/Luxembourg/LNS2128808/2020; hCoV-19/Luxembourg/LNS2848109/2020; hCoV-19/Luxembourg/LNS3694003/2020; hCoV-19/Luxembourg/LNS5731562/2020; hCoV-19/Luxembourg/LNS6282845/2020; hCoV-19/Luxembourg/LNS8489624/2020; hCoV-19/Luxembourg/LNS9371718/2020; hCoV-19/Luxembourg/Lux1/2020; hCoV-19/Malaysia/188407/2020; hCoV-19/Malaysia/189332/2020; hCoV-19/Malaysia/MKAK-CL-2020-5045/2020; hCoV-19/Malaysia/MKAK-CL-2020-5047/2020; hCoV-19/Malaysia/MKAK-CL-2020-5049/2020; hCoV-19/Malaysia/MKAK-CL-2020-6430/2020; hCoV-19/Malaysia/MKAK-CL-2020-7554/2020; hCoV-19/Mexico/CDMX-InDRE\_01/2020; hCoV-19/NanChang/JX216/2020; hCoV-19/Nepal/61/2020; hCoV-19/Netherlands/Blaricum\_1364780/2020; hCoV-19/Netherlands/Eindhoven\_1363782/2020; hCoV-19/Netherlands/Flevoland\_1/2020; hCoV-19/Netherlands/Gelderland\_1/2020; hCoV-19/Netherlands/Gelderland\_1/2020; hCoV-19/Netherlands/Gelderland\_2/2020; hCoV-19/Netherlands/Gelderland\_3/2020; hCoV-19/Netherlands/Haarlem\_1363688/2020; hCoV-19/Netherlands/Helmond\_1363548/2020; hCoV-19/Netherlands/Limburg\_2/2020; hCoV-19/Netherlands/Limburg\_3/2020; hCoV-19/Netherlands/Limburg\_4/2020; hCoV-19/Netherlands/Limburg\_5/2020; hCoV-19/Netherlands/Limburg\_7/2020; hCoV-19/Netherlands/NA\_1/2020; hCoV-19/Netherlands/NA\_10/2020; hCoV-19/Netherlands/NA\_11/2020; hCoV-



19/Netherlands/NA\_12/2020; hCoV-19/Netherlands/NA\_13/2020; hCoV-19/Netherlands/NA\_14/2020; hCoV-19/Netherlands/NA\_15/2020; hCoV-19/Netherlands/NA\_16/2020; hCoV-19/Netherlands/NA\_17/2020; hCoV-19/Netherlands/NA\_18/2020; hCoV-19/Netherlands/NA\_19/2020; hCoV-19/Netherlands/NA\_2/2020; hCoV-19/Netherlands/NA\_21/2020; hCoV-19/Netherlands/NA\_23/2020; hCoV-19/Netherlands/NA\_24/2020; hCoV-19/Netherlands/NA\_25/2020; hCoV-19/Netherlands/NA\_26/2020; hCoV-19/Netherlands/NA\_27/2020; hCoV-19/Netherlands/NA\_28/2020; hCoV-19/Netherlands/NA\_29/2020; hCoV-19/Netherlands/NA\_30/2020; hCoV-19/Netherlands/NA\_31/2020; hCoV-19/Netherlands/NA\_34/2020; hCoV-19/Netherlands/NA\_35/2020; hCoV-19/Netherlands/NA\_6/2020; hCoV-19/Netherlands/NA\_7/2020; hCoV-19/Netherlands/NA\_8/2020; hCoV-19/Netherlands/NA\_9/2020; hCoV-19/Netherlands/NoordBrabant\_1/2020; hCoV-19/Netherlands/NoordBrabant\_14/2020; hCoV-19/Netherlands/NoordBrabant\_16/2020; hCoV-19/Netherlands/NoordBrabant\_17/2020; hCoV-19/Netherlands/NoordBrabant\_2/2020; hCoV-19/Netherlands/NoordBrabant\_20/2020; hCoV-19/Netherlands/NoordBrabant\_21/2020; hCoV-19/Netherlands/NoordBrabant\_22/2020; hCoV-19/Netherlands/NoordBrabant\_23/2020; hCoV-19/Netherlands/NoordBrabant\_25/2020; hCoV-19/Netherlands/NoordBrabant\_26/2020; hCoV-19/Netherlands/NoordBrabant\_3/2020; hCoV-19/Netherlands/NoordBrabant\_36/2020; hCoV-19/Netherlands/NoordBrabant\_39/2020; hCoV-19/Netherlands/NoordBrabant\_41/2020; hCoV-19/Netherlands/NoordBrabant\_45/2020; hCoV-19/Netherlands/NoordBrabant\_46/2020; hCoV-19/Netherlands/NoordBrabant\_5/2020; hCoV-19/Netherlands/NoordBrabant\_55/2020; hCoV-19/Netherlands/NoordBrabant\_56/2020; hCoV-19/Netherlands/NoordBrabant\_58/2020; hCoV-19/Netherlands/NoordBrabant\_59/2020; hCoV-19/Netherlands/NoordBrabant\_6/2020; hCoV-19/Netherlands/NoordBrabant\_62/2020; hCoV-19/Netherlands/NoordBrabant\_64/2020; hCoV-19/Netherlands/NoordBrabant\_67/2020; hCoV-19/Netherlands/NoordHolland\_1/2020; hCoV-19/Netherlands/NoordHolland\_2/2020; hCoV-19/Netherlands/NoordHolland\_3/2020; hCoV-19/Netherlands/Nootdorp\_1364222/2020; hCoV-19/Netherlands/Overijssel\_1/2020; hCoV-19/Netherlands/Overijssel\_2/2020; hCoV-19/Netherlands/Rotterdam\_1364740/2020; hCoV-19/Netherlands/Tilburg\_1364286/2020; hCoV-19/Netherlands/Utrecht\_1/2020; hCoV-19/Netherlands/Utrecht\_10/2020; hCoV-19/Netherlands/Utrecht\_11/2020; hCoV-19/Netherlands/Utrecht\_13/2020; hCoV-19/Netherlands/Utrecht\_13/2020; hCoV-19/Netherlands/Utrecht\_1363564/2020; hCoV-19/Netherlands/Utrecht\_1363628/2020; hCoV-19/Netherlands/Utrecht\_14/2020; hCoV-19/Netherlands/Utrecht\_15/2020; hCoV-19/Netherlands/Utrecht\_16/2020; hCoV-19/Netherlands/Utrecht\_17/2020; hCoV-19/Netherlands/Utrecht\_18/2020; hCoV-19/Netherlands/Utrecht\_2/2020; hCoV-19/Netherlands/Utrecht\_3/2020; hCoV-19/Netherlands/Utrecht\_4/2020; hCoV-19/Netherlands/Utrecht\_5/2020; hCoV-19/Netherlands/Utrecht\_6/2020; hCoV-19/Netherlands/Utrecht\_7/2020; hCoV-19/Netherlands/Utrecht\_8/2020; hCoV-19/Netherlands/Zeewolde\_1365080/2020; hCoV-19/Netherlands/ZuidHolland\_1/2020; hCoV-19/Netherlands/ZuidHolland\_10/2020; hCoV-19/Netherlands/ZuidHolland\_11/2020; hCoV-19/Netherlands/ZuidHolland\_13/2020; hCoV-19/Netherlands/ZuidHolland\_14/2020; hCoV-19/Netherlands/ZuidHolland\_15/2020; hCoV-19/Netherlands/ZuidHolland\_16/2020; hCoV-19/Netherlands/ZuidHolland\_17/2020; hCoV-19/Netherlands/ZuidHolland\_18/2020; hCoV-19/Netherlands/ZuidHolland\_19/2020; hCoV-19/Netherlands/ZuidHolland\_2/2020; hCoV-19/Netherlands/ZuidHolland\_20/2020; hCoV-19/Netherlands/ZuidHolland\_22/2020; hCoV-19/Netherlands/ZuidHolland\_24/2020; hCoV-19/Netherlands/ZuidHolland\_25/2020; hCoV-19/Netherlands/ZuidHolland\_26/2020; hCoV-19/Netherlands/ZuidHolland\_27/2020; hCoV-19/Netherlands/ZuidHolland\_28/2020; hCoV-

19/Netherlands/ZuidHolland\_29/2020; hCoV-19/Netherlands/ZuidHolland\_31/2020; hCoV-19/Netherlands/ZuidHolland\_8/2020; hCoV-19/Netherlands/ZuidHolland\_9/2020; hCoV-19/New Zealand/20VR0275/2020; hCoV-19/New Zealand/01/2020; hCoV-19/New Zealand/20VR0189/2020; hCoV-19/New Zealand/20VR0276/2020; hCoV-19/Nonthaburi/61/2020; hCoV-19/Nonthaburi/74/2020; hCoV-19/Norway/1379/2020; hCoV-19/Norway/1380/2020; hCoV-19/Norway/1493/2020; hCoV-19/Norway/1526/2020; hCoV-19/Norway/1538/2020; hCoV-19/Norway/1539/2020; hCoV-19/Pakistan/Gilgit1/2020; hCoV-19/Panama/328677/2020; hCoV-19/Peru/010/2020; hCoV-19/Poland/PL\_P1/2020; hCoV-19/Portugal/CV62/2020; hCoV-19/Portugal/CV63/2020; hCoV-19/Portugal/PT0001b/2020; hCoV-19/Portugal/PT0003/2020; hCoV-19/Portugal/PT0004/2020; hCoV-19/Portugal/PT0005/2020; hCoV-19/Portugal/PT0006a/2020; hCoV-19/Portugal/PT0006b/2020; hCoV-19/Portugal/PT0007/2020; hCoV-19/Portugal/PT0008/2020; hCoV-19/Portugal/PT0009/2020; hCoV-19/Portugal/PT0010/2020; hCoV-19/Portugal/PT0011/2020; hCoV-19/Portugal/PT0012/2020; hCoV-19/Portugal/PT0013/2020; hCoV-19/Portugal/PT0014/2020; hCoV-19/Portugal/PT0016/2020; hCoV-19/Portugal/PT0017/2020; hCoV-19/Portugal/PT0018/2020; hCoV-19/Portugal/PT0019/2020; hCoV-19/Portugal/PT0020/2020; hCoV-19/Portugal/PT0021/2020; hCoV-19/Portugal/PT0022/2020; hCoV-19/Portugal/PT0023/2020; hCoV-19/Portugal/PT0024/2020; hCoV-19/Portugal/PT0025/2020; hCoV-19/Portugal/PT0026/2020; hCoV-19/Portugal/PT0027/2020; hCoV-19/Portugal/PT0028/2020; hCoV-19/Portugal/PT0029/2020; hCoV-19/Portugal/PT0030/2020; hCoV-19/Portugal/PT0031/2020; hCoV-19/Portugal/PT0032/2020; hCoV-19/Portugal/PT0033/2020; hCoV-19/Portugal/PT0034/2020; hCoV-19/Portugal/PT0035/2020; hCoV-19/Portugal/PT0036/2020; hCoV-19/Portugal/PT0037/2020; hCoV-19/Portugal/PT0038/2020; hCoV-19/Portugal/PT0039/2020; hCoV-19/Portugal/PT0040/2020; hCoV-19/Portugal/PT0042/2020; hCoV-19/Russia/StPetersburg-3524/2020; hCoV-19/Saudi Arabia/SCDC-3324/2020; hCoV-19/Saudi Arabia/SCDC-3321/2020; hCoV-19/Saudi Arabia/KAIMRC-Alghoribi/2020; hCoV-19/Scotland/CVR05/2020; hCoV-19/Scotland/CVR07/2020; hCoV-19/Scotland/CVR10/2020; hCoV-19/Scotland/EDB003/2020; hCoV-19/Scotland/EDB004/2020; hCoV-19/Senegal/003/2020; hCoV-19/Senegal/016/2020; hCoV-19/Senegal/020/2020; hCoV-19/Senegal/026/2020; hCoV-19/Senegal/073/2020; hCoV-19/Senegal/082/2020; hCoV-19/Senegal/087/2020; hCoV-19/Senegal/094/2020; hCoV-19/Senegal/136/2020; hCoV-19/Senegal/139/2020; hCoV-19/Shandong/IVDC-SD-001/2020; hCoV-19/Shandong/LY003/2020; hCoV-19/Shandong/LY004/2020; hCoV-19/Shandong/LY005/2020; hCoV-19/Shandong/LY007/2020; hCoV-19/Shandong/LY008/2020; hCoV-19/Shanghai/SH0002/2020; hCoV-19/Shanghai/SH0003/2020; hCoV-19/Shanghai/SH0004/2020; hCoV-19/Shanghai/SH0005/2020; hCoV-19/Shanghai/SH0007/2020; hCoV-19/Shanghai/SH0008/2020; hCoV-19/Shanghai/SH0009/2020; hCoV-19/Shanghai/SH0010/2020; hCoV-19/Shanghai/SH0011/2020; hCoV-19/Shanghai/SH0012/2020; hCoV-19/Shanghai/SH0013/2020; hCoV-19/Shanghai/SH0020/2020; hCoV-19/Shanghai/SH0021/2020; hCoV-19/Shanghai/SH0022/2020; hCoV-19/Shanghai/SH0023/2020; hCoV-19/Shanghai/SH0024/2020; hCoV-19/Shanghai/SH0025/2020; hCoV-19/Shanghai/SH0026/2020; hCoV-19/Shanghai/SH0027/2020; hCoV-19/Shanghai/SH0028/2020; hCoV-19/Shanghai/SH0029/2020; hCoV-19/Shanghai/SH0030/2020; hCoV-19/Shanghai/SH0031/2020; hCoV-19/Shanghai/SH0032/2020; hCoV-19/Shanghai/SH0033/2020; hCoV-19/Shanghai/SH0039/2020; hCoV-19/Shanghai/SH0040/2020; hCoV-19/Shanghai/SH0041/2020; hCoV-19/Shanghai/SH0043/2020; hCoV-19/Shanghai/SH0044/2020; hCoV-19/Shanghai/SH0045/2020; hCoV-19/Shanghai/SH0047/2020; hCoV-19/Shanghai/SH0050/2020; hCoV-19/Shanghai/SH0051/2020; hCoV-19/Shanghai/SH0053/2020; hCoV-19/Shanghai/SH0054/2020; hCoV-19/Shanghai/SH0055/2020; hCoV-19/Shanghai/SH0056/2020; hCoV-19/Shanghai/SH0058/2020; hCoV-19/Shanghai/SH0059/2020; hCoV-19/Shanghai/SH0060/2020; hCoV-19/Shanghai/SH0065/2020; hCoV-

19/Shanghai/SH0066/2020; hCoV-19/Shanghai/SH0067/2020; hCoV-19/Shanghai/SH0069/2020; hCoV-19/Shanghai/SH0070/2020; hCoV-19/Shanghai/SH0073/2020; hCoV-19/Shanghai/SH0074/2020; hCoV-19/Shanghai/SH0075/2020; hCoV-19/Shanghai/SH0076/2020; hCoV-19/Shanghai/SH0077/2020; hCoV-19/Shanghai/SH0079/2020; hCoV-19/Shanghai/SH0080/2020; hCoV-19/Shanghai/SH0083/2020; hCoV-19/Shanghai/SH0088/2020; hCoV-19/Shanghai/SH0093/2020; hCoV-19/Shanghai/SH0094/2020; hCoV-19/Shanghai/SH01/2020; hCoV-19/Shanghai/SH0101/2020; hCoV-19/Shanghai/SH0102/2020; hCoV-19/Shanghai/SH0106/2020; hCoV-19/Shanghai/SH0107/2020; hCoV-19/Shanghai/SH0109/2020; hCoV-19/Shanghai/SH0110/2020; hCoV-19/Shanghai/SH0112/2020; hCoV-19/Shanghai/SH0114/2020; hCoV-19/Shanghai/SH0115/2020; hCoV-19/Shanghai/SH0117/2020; hCoV-19/Shanghai/SH0119/2020; hCoV-19/Shanghai/SH0121/2020; hCoV-19/Shanghai/SH0125/2020; hCoV-19/Shanghai/SH0126/2020; hCoV-19/Shanghai/SH0128/2020; hCoV-19/Shenzhen/HKU-SZ-002/2020; hCoV-19/Shenzhen/HKU-SZ-005/2020; hCoV-19/Shenzhen/SZTH-002/2020; hCoV-19/Shenzhen/SZTH-003/2020; hCoV-19/Shenzhen/SZTH-004/2020; hCoV-19/Sichuan/IVDC-SC-001/2020; hCoV-19/Singapore/1/2020; hCoV-19/Singapore/10/2020; hCoV-19/Singapore/11/2020; hCoV-19/Singapore/2/2020; hCoV-19/Singapore/3/2020; hCoV-19/Singapore/4/2020; hCoV-19/Singapore/5/2020; hCoV-19/Singapore/6/2020; hCoV-19/Singapore/7/2020; hCoV-19/Singapore/8/2020; hCoV-19/Singapore/9/2020; hCoV-19/Slovakia/SK-BMC1/2020; hCoV-19/Slovakia/SK-BMC2/2020; hCoV-19/Slovakia/SK-BMC5/2020; hCoV-19/South Korea/KCDC03/2020; hCoV-19/South Korea/SNU01/2020; hCoV-19/South Korea/KCDC05/2020; hCoV-19/South Korea/KCDC06/2020; hCoV-19/South Korea/KCDC07/2020; hCoV-19/South Korea/KCDC12/2020; hCoV-19/South Korea/KCDC24/2020; hCoV-19/South Korea/KUMC01/2020; hCoV-19/South Korea/KUMC02/2020; hCoV-19/South Korea/KUMC03/2020; hCoV-19/South Korea/KUMC04/2020; hCoV-19/South Korea/KUMC05/2020; hCoV-19/South Korea/KUMC06/2020; hCoV-19/South Africa/R03006/2020; hCoV-19/Spain/Andalucia201272/2020; hCoV-19/Spain/CastillaLaMancha201328/2020; hCoV-19/Spain/CastillaLaMancha201329/2020; hCoV-19/Spain/CastillaLeon201061/2020; hCoV-19/Spain/CastillaLeon201323/2020; hCoV-19/Spain/CastillaLeon201372/2020; hCoV-19/Spain/CastillaLeon201437/2020; hCoV-19/Spain/Cataluna201396/2020; hCoV-19/Spain/Galicia201663/2020; hCoV-19/Spain/Madrid\_H10\_39/2020; hCoV-19/Spain/Madrid\_H11\_40/2020; hCoV-19/Spain/Madrid\_H3\_10/2020; hCoV-19/Spain/Madrid\_H5\_34/2020; hCoV-19/Spain/Madrid\_H7\_36/2020; hCoV-19/Spain/Madrid\_H8\_37/2020; hCoV-19/Spain/Madrid\_LP12\_21/2020; hCoV-19/Spain/Madrid\_LP14\_3/2020; hCoV-19/Spain/Madrid\_LP15\_4/2020; hCoV-19/Spain/Madrid\_R10\_33/2020; hCoV-19/Spain/Madrid\_R2\_15/2020; hCoV-19/Spain/Madrid\_R5\_8/2020; hCoV-19/Spain/Madrid201105/2020; hCoV-19/Spain/Madrid201442/2020; hCoV-19/Spain/PaisVasco201382/2020; hCoV-19/Spain/Valencia3/2020; hCoV-19/Spain/Valencia5/2020; hCoV-19/Spain/Valencia6/2020; hCoV-19/Spain/Valencia7/2020; hCoV-19/Spain/Valencia8/2020; hCoV-19/Sweden/01/2020; hCoV-19/Switzerland/1000477377/2020; hCoV-19/Switzerland/1000477757/2020; hCoV-19/Switzerland/1000477796/2020; hCoV-19/Switzerland/1000477797/2020; hCoV-19/Switzerland/1000477806/2020; hCoV-19/Switzerland/AG0361/2020; hCoV-19/Switzerland/AG7120/2020; hCoV-19/Switzerland/BE2536/2020; hCoV-19/Switzerland/BE6651/2020; hCoV-19/Switzerland/BL0902/2020; hCoV-19/Switzerland/BS0914/2020; hCoV-19/Switzerland/GE0199/2020; hCoV-19/Switzerland/GE06207/2020; hCoV-19/Switzerland/GE1402/2020; hCoV-19/Switzerland/GE1422/2020; hCoV-19/Switzerland/GE3121/2020; hCoV-19/Switzerland/GE3895/2020; hCoV-19/Switzerland/GE4135/2020; hCoV-

19/Switzerland/GE4984/2020; hCoV-19/Switzerland/GE5373/2020; hCoV-19/Switzerland/GE6679/2020; hCoV-19/Switzerland/GE8102/2020; hCoV-19/Switzerland/GE9586/2020; hCoV-19/Switzerland/GR2988/2020; hCoV-19/Switzerland/GR3043/2020; hCoV-19/Switzerland/SZ1417/2020; hCoV-19/Switzerland/TI2045/2020; hCoV-19/Switzerland/TI9486/2020; hCoV-19/Switzerland/VD0503/2020; hCoV-19/Switzerland/VD5615/2020; hCoV-19/Taiwan/2/2020; hCoV-19/Taiwan/3/2020; hCoV-19/Taiwan/4/2020; hCoV-19/Taiwan/CGMH-CGU-01/2020; hCoV-19/Taiwan/CGMH-CGU-03/2020; hCoV-19/Taiwan/CGMH-CGU-04/2020; hCoV-19/Taiwan/CGMH-CGU-05/2020; hCoV-19/Taiwan/CGMH-CGU-06/2020; hCoV-19/Taiwan/CGMH-CGU-07/2020; hCoV-19/Taiwan/CGMH-CGU-08/2020; hCoV-19/Taiwan/CGMH-CGU-09/2020; hCoV-19/Taiwan/CGMH-CGU-10/2020; hCoV-19/Taiwan/CGMH-CGU-11/2020; hCoV-19/Taiwan/CGMH-CGU-12/2020; hCoV-19/Taiwan/NTU01/2020; hCoV-19/Taiwan/NTU02/2020; hCoV-19/Taiwan/NTU03/2020; hCoV-19/Tianmen/HBCDC-HB-07/2020; hCoV-19/USA/AZ1/2020; hCoV-19/USA/CA1/2020; hCoV-19/USA/CA2/2020; hCoV-19/USA/CA3/2020; hCoV-19/USA/CA4/2020; hCoV-19/USA/CA5/2020; hCoV-19/USA/CA7/2020; hCoV-19/USA/CA8/2020; hCoV-19/USA/CA9/2020; hCoV-19/USA/CA-CDPH-UC1/2020; hCoV-19/USA/CA-CDPH-UC2/2020; hCoV-19/USA/CA-CDPH-UC26/2020; hCoV-19/USA/CA-CDPH-UC3/2020; hCoV-19/USA/CA-CDPH-UC4/2020; hCoV-19/USA/CA-CDPH-UC6/2020; hCoV-19/USA/CA-CDPH-UC7/2020; hCoV-19/USA/CA-CDPH-UC9/2020; hCoV-19/USA/CA-MG0987/2020; hCoV-19/USA/CA-PC101P/2020; hCoV-19/USA/CA-SCCPHD-UC14/2020; hCoV-19/USA/CA-SCCPHD-UC16/2020; hCoV-19/USA/CruiseA-1/2020; hCoV-19/USA/CruiseA-10/2020; hCoV-19/USA/CruiseA-11/2020; hCoV-19/USA/CruiseA-12/2020; hCoV-19/USA/CruiseA-13/2020; hCoV-19/USA/CruiseA-14/2020; hCoV-19/USA/CruiseA-15/2020; hCoV-19/USA/CruiseA-16/2020; hCoV-19/USA/CruiseA-17/2020; hCoV-19/USA/CruiseA-19/2020; hCoV-19/USA/CruiseA-2/2020; hCoV-19/USA/CruiseA-21/2020; hCoV-19/USA/CruiseA-22/2020; hCoV-19/USA/CruiseA-23/2020; hCoV-19/USA/CruiseA-24/2020; hCoV-19/USA/CruiseA-25/2020; hCoV-19/USA/CruiseA-26/2020; hCoV-19/USA/CruiseA-3/2020; hCoV-19/USA/CruiseA-4/2020; hCoV-19/USA/CruiseA-5/2020; hCoV-19/USA/CruiseA-6/2020; hCoV-19/USA/CruiseA-7/2020; hCoV-19/USA/CruiseA-8/2020; hCoV-19/USA/CruiseA-9/2020; hCoV-19/USA/CZB-RR057-005/2020; hCoV-19/USA/CZB-RR057-006/2020; hCoV-19/USA/CZB-RR057-007/2020; hCoV-19/USA/CZB-RR057-011/2020; hCoV-19/USA/CZB-RR057-013/2020; hCoV-19/USA/CZB-RR057-014/2020; hCoV-19/USA/CZB-RR057-015/2020; hCoV-19/USA/IL1/2020; hCoV-19/USA/IL2/2020; hCoV-19/USA/MA1/2020; hCoV-19/USA/MN25-MDH25/2020; hCoV-19/USA/MN26-MDH26/2020; hCoV-19/USA/MN29-MDH29/2020; hCoV-19/USA/MN2-MDH2/2020; hCoV-19/USA/MN30-MDH30/2020; hCoV-19/USA/MN31-MDH31/2020; hCoV-19/USA/MN32-MDH32/2020; hCoV-19/USA/MN35-MDH35/2020; hCoV-19/USA/MN36-MDH36/2020; hCoV-19/USA/MN38-MDH38/2020; hCoV-19/USA/MN39-MDH39/2020; hCoV-19/USA/MN3-MDH3/2020; hCoV-19/USA/MN40-MDH40/2020; hCoV-19/USA/MN41-MDH41/2020; hCoV-19/USA/MN42-MDH42/2020; hCoV-19/USA/MN43-MDH43/2020; hCoV-19/USA/MN44-MDH44/2020; hCoV-19/USA/MN45-MDH45/2020; hCoV-19/USA/MN46-MDH46/2020; hCoV-19/USA/MN48-MDH48/2020; hCoV-19/USA/MN52-MDH52/2020; hCoV-19/USA/MN53-MDH53/2020; hCoV-19/USA/MN55-MDH55/2020; hCoV-19/USA/MN56-MDH56/2020; hCoV-19/USA/MN57-MDH57/2020; hCoV-19/USA/MN58-MDH58/2020; hCoV-19/USA/MN59-MDH59/2020; hCoV-19/USA/NY1-PV08001/2020; hCoV-19/USA/NY2-PV08100/2020; hCoV-19/USA/NY-NYUMC11/2020; hCoV-19/USA/NY-NYUMC12/2020; hCoV-19/USA/NY-NYUMC13/2020; hCoV-19/USA/NY-NYUMC14/2020; hCoV-19/USA/NY-NYUMC15/2020; hCoV-19/USA/NY-NYUMC18/2020; hCoV-19/USA/NY-NYUMC19/2020; hCoV-19/USA/NY-NYUMC2/2020; hCoV-19/USA/NY-NYUMC3/2020; hCoV-19/USA/NY-NYUMC4/2020; hCoV-19/USA/NY-NYUMC7/2020; hCoV-19/USA/NY-NYUMC8/2020; hCoV-19/USA/TX1/2020; hCoV-19/USA/UC-CDPH-UC11/2020; hCoV-19/USA/UPHL-01/2020; hCoV-19/USA/UPHL-03/2020; hCoV-19/USA/UPHL-04/2020; hCoV-





19/USA/WA-UW269/2020; hCoV-19/USA/WA-UW270/2020; hCoV-19/USA/WA-UW271/2020; hCoV-19/USA/WA-UW272/2020; hCoV-19/USA/WA-UW273/2020; hCoV-19/USA/WA-UW274/2020; hCoV-19/USA/WA-UW276/2020; hCoV-19/USA/WA-UW277/2020; hCoV-19/USA/WA-UW279/2020; hCoV-19/USA/WA-UW28/2020; hCoV-19/USA/WA-UW282/2020; hCoV-19/USA/WA-UW283/2020; hCoV-19/USA/WA-UW284/2020; hCoV-19/USA/WA-UW285/2020; hCoV-19/USA/WA-UW286/2020; hCoV-19/USA/WA-UW287/2020; hCoV-19/USA/WA-UW288/2020; hCoV-19/USA/WA-UW29/2020; hCoV-19/USA/WA-UW290/2020; hCoV-19/USA/WA-UW291/2020; hCoV-19/USA/WA-UW292/2020; hCoV-19/USA/WA-UW294/2020; hCoV-19/USA/WA-UW295/2020; hCoV-19/USA/WA-UW296/2020; hCoV-19/USA/WA-UW297/2020; hCoV-19/USA/WA-UW30/2020; hCoV-19/USA/WA-UW31/2020; hCoV-19/USA/WA-UW32/2020; hCoV-19/USA/WA-UW33/2020; hCoV-19/USA/WA-UW34/2020; hCoV-19/USA/WA-UW35/2020; hCoV-19/USA/WA-UW36/2020; hCoV-19/USA/WA-UW37/2020; hCoV-19/USA/WA-UW38/2020; hCoV-19/USA/WA-UW39/2020; hCoV-19/USA/WA-UW40/2020; hCoV-19/USA/WA-UW41/2020; hCoV-19/USA/WA-UW43/2020; hCoV-19/USA/WA-UW44/2020; hCoV-19/USA/WA-UW45/2020; hCoV-19/USA/WA-UW46/2020; hCoV-19/USA/WA-UW48/2020; hCoV-19/USA/WA-UW49/2020; hCoV-19/USA/WA-UW50/2020; hCoV-19/USA/WA-UW51/2020; hCoV-19/USA/WA-UW52/2020; hCoV-19/USA/WA-UW54/2020; hCoV-19/USA/WA-UW55/2020; hCoV-19/USA/WA-UW56/2020; hCoV-19/USA/WA-UW57/2020; hCoV-19/USA/WA-UW59/2020; hCoV-19/USA/WA-UW60/2020; hCoV-19/USA/WA-UW62/2020; hCoV-19/USA/WA-UW63/2020; hCoV-19/USA/WA-UW64/2020; hCoV-19/USA/WA-UW66/2020; hCoV-19/USA/WA-UW67/2020; hCoV-19/USA/WA-UW68/2020; hCoV-19/USA/WA-UW69/2020; hCoV-19/USA/WA-UW70/2020; hCoV-19/USA/WA-UW71/2020; hCoV-19/USA/WA-UW72/2020; hCoV-19/USA/WA-UW73/2020; hCoV-19/USA/WA-UW74/2020; hCoV-19/USA/WA-UW75/2020; hCoV-19/USA/WA-UW76/2020; hCoV-19/USA/WA-UW77/2020; hCoV-19/USA/WA-UW78/2020; hCoV-19/USA/WA-UW79/2020; hCoV-19/USA/WA-UW80/2020; hCoV-19/USA/WA-UW81/2020; hCoV-19/USA/WA-UW82/2020; hCoV-19/USA/WA-UW83/2020; hCoV-19/USA/WA-UW84/2020; hCoV-19/USA/WA-UW85/2020; hCoV-19/USA/WA-UW86/2020; hCoV-19/USA/WA-UW87/2020; hCoV-19/USA/WA-UW88/2020; hCoV-19/USA/WA-UW89/2020; hCoV-19/USA/WA-UW91/2020; hCoV-19/USA/WA-UW92/2020; hCoV-19/USA/WA-UW93/2020; hCoV-19/USA/WA-UW94/2020; hCoV-19/USA/WA-UW95/2020; hCoV-19/USA/WA-UW96/2020; hCoV-19/USA/WA-UW97/2020; hCoV-19/USA/WA-UW98/2020; hCoV-19/USA/WA-UW99/2020; hCoV-19/USA/WI-02/2020; hCoV-19/USA/WI-03/2020; hCoV-19/USA/WI-04/2020; hCoV-19/USA/WI-05/2020; hCoV-19/USA/WI-06/2020; hCoV-19/USA/WI-07/2020; hCoV-19/USA/WI-08/2020; hCoV-19/USA/WI-09/2020; hCoV-19/USA/WI-10/2020; hCoV-19/USA/WI-11/2020; hCoV-19/USA/WI-12/2020; hCoV-19/USA/WI-13/2020; hCoV-19/USA/WI-14/2020; hCoV-19/USA/WI-15/2020; hCoV-19/USA/WI-16/2020; hCoV-19/USA/WI-17/2020; hCoV-19/USA/WI-18/2020; hCoV-19/USA/WI-19/2020; hCoV-19/USA/WI-21/2020; hCoV-19/USA/WI-22/2020; hCoV-19/USA/WI-23/2020; hCoV-19/USA/WI-24/2020; hCoV-19/USA/WI-GMF-00018/2020; hCoV-19/USA/WI-GMF-00228/2020; hCoV-19/USA/WI-GMF-00232/2020; hCoV-19/Vietnam/19-01S/2020; hCoV-19/Vietnam/39607/2020; hCoV-19/Vietnam/CM295/2020; hCoV-19/Vietnam/CM296/2020; hCoV-19/Vietnam/CM99/2020; hCoV-19/Wales/PHW04/2020; hCoV-19/Wales/PHW1/2020; hCoV-19/Wales/PHW2/2020; hCoV-19/Wales/PHW21/2020; hCoV-19/Wales/PHW27/2020; hCoV-19/Wales/PHW28/2020; hCoV-19/Wales/PHW32/2020; hCoV-19/Wales/PHW33/2020; hCoV-19/Wales/PHW35/2020; hCoV-19/Wales/PHW37/2020; hCoV-19/Wales/PHWC-23D6A/2020; hCoV-19/Wales/PHWC-23E2B/2020; hCoV-19/Wales/PHWC-23FFB/2020; hCoV-19/Wales/PHWC-24006/2020; hCoV-19/Wales/PHWC-24024/2020; hCoV-19/Wales/PHWC-240D9/2020; hCoV-19/Wales/PHWC-240E8/2020; hCoV-19/Wales/PHWC-240F7/2020; hCoV-19/Wales/PHWC-24121/2020; hCoV-19/Wales/PHWC-2415E/2020; hCoV-19/Wales/PHWC-2419A/2020; hCoV-19/Wales/PHWC-2422E/2020; hCoV-19/Wales/PHWC-2423D/2020; hCoV-19/Wales/PHWC-24279/2020; hCoV-19/Wales/PHWC-24288/2020; hCoV-19/Wales/PHWC-242C4/2020; hCoV-

19/Wuhan/HBCDC-HB-01/2019; hCoV-19/Wuhan/HBCDC-HB-02/2019; hCoV-19/Wuhan/HBCDC-HB-02/2020; hCoV-19/Wuhan/HBCDC-HB-03/2019; hCoV-19/Wuhan/HBCDC-HB-03/2020; hCoV-19/Wuhan/HBCDC-HB-04/2020; hCoV-19/Wuhan/HBCDC-HB-05/2020; hCoV-19/Wuhan/HBCDC-HB-06/2020; hCoV-19/Wuhan/IPBCAMS-WH-01/2019; hCoV-19/Wuhan/IPBCAMS-WH-02/2019; hCoV-19/Wuhan/IPBCAMS-WH-03/2019; hCoV-19/Wuhan/IPBCAMS-WH-04/2019; hCoV-19/Wuhan/IPBCAMS-WH-05/2020; hCoV-19/Wuhan/IVDC-HB-01/2019; hCoV-19/Wuhan/IVDC-HB-04/2020; hCoV-19/Wuhan/IVDC-HB-05/2019; hCoV-19/Wuhan/IVDC-HB-envF13-20/2020; hCoV-19/Wuhan/IVDC-HB-envF13-21/2020; hCoV-19/Wuhan/WH01/2019; hCoV-19/Wuhan/WH03/2020; hCoV-19/Wuhan/WH04/2020; hCoV-19/Wuhan/WIV02/2019; hCoV-19/Wuhan/WIV04/2019; hCoV-19/Wuhan/WIV05/2019; hCoV-19/Wuhan/WIV06/2019; hCoV-19/Wuhan/WIV07/2019; hCoV-19/Wuhan-Hu-1/2019; hCoV-19/Yunnan/IVDC-YN-003/2020; hCoV-19/Zhejiang/WZ-01/2020; hCoV-19/Zhejiang/WZ-02/2020.
